# Supplementary material for: The Influence of Electronic Health Record Use on Physician Burnout: Cross-Sectional Survey
Source: PubMed Central journal article supplement (PMC7392132; doi:10.2196/19274), 2020-07-15
Supplement: jmir_v22i7e19274_app1.pdf [file jmir_v22i7e19274_app1.pdf]

# Survey Questions

## Section 1: Demographics

Q1. I am a:

- Staff physician
- Fellow
- Resident

Q2. How would you describe your clinical activities?

- Inpatient Physician
- Outpatient Physician
- Emergency Department
- Telehealth
- Outreach

(Please select all that apply.)

Q3. What is your current academic job description?

- Clinician Administrator
- Clinician Educator
- Clinician Investigator
- Clinician Scientist
- Clinician Teacher
- Clinician in Quality & Innovation
- None of the above

Q4. What is your primary division?

- Addictions
- Adult Neurodevelopment and Geriatric Psychiatry
- Child and Adolescent Psychiatry
- Forensics
- General Adult and Health Systems Psychiatry
- Medicine in Psychiatry
- Schizophrenia

Q5. How long have you been practicing as a physician?

- 0-5 years
- 6-10 years
- 11-15 years
- 16-20 years
- 21-25 years
- 26+ years

Q6. How frequently do you provide clinical care at the hospital?

- Part-time
- Full-time

Q7. What is your age?

- < 30
- 31-40
- 41-50
- 51-60
- 61+

Q8. Please select the option that best describes you:

- Woman
- Man
- Gender-fluid, non-binary, and/or Two-spirit
- I prefer not to answer

## Section 2: Use of EHR

Q9. Estimated number of patients seen per week.

---

Q10. Estimated time spent in EHR per patient seen. This includes: documentation, orders, chart review and other uses of EHR. (Please provide a value in minutes.)

---

Q11. How much time do you spend per week using EHR after hours? (After hours defined as after 6 PM/before 6 AM or during the weekends, not including duty doctor or physician on call shifts) (Please provide a value in minutes or hours.)

---

Q12. Did you provide a value in minutes or hours for the previous question?

- Minutes
- Hours

|                                                                 | Strongly Disagree     | Disagree              | Neutral               | Agree                 | Strongly Agree        |
|-----------------------------------------------------------------|-----------------------|-----------------------|-----------------------|-----------------------|-----------------------|
| Q13. EHR adds to my daily frustration.                          | <input type="radio"/> | <input type="radio"/> | <input type="radio"/> | <input type="radio"/> | <input type="radio"/> |
| Q14. EHR improves communication within the .<br>circle of care. | <input type="radio"/> | <input type="radio"/> | <input type="radio"/> | <input type="radio"/> | <input type="radio"/> |
| Q15. EHR enables me to deliver high quality care.               | <input type="radio"/> | <input type="radio"/> | <input type="radio"/> | <input type="radio"/> | <input type="radio"/> |
| Q16. EHR helps keep my patients safe.                           | <input type="radio"/> | <input type="radio"/> | <input type="radio"/> | <input type="radio"/> | <input type="radio"/> |

## Section 3: Training

|                                                              | Strongly Disagree     | Disagree              | Neutral               | Agree                 | Strongly Agree        |
|--------------------------------------------------------------|-----------------------|-----------------------|-----------------------|-----------------------|-----------------------|
| Q17. I feel proficient with my the EHR use.                  | <input type="radio"/> | <input type="radio"/> | <input type="radio"/> | <input type="radio"/> | <input type="radio"/> |
| Q18. My initial training prepared me to use the<br>EHR well. | <input type="radio"/> | <input type="radio"/> | <input type="radio"/> | <input type="radio"/> | <input type="radio"/> |
| Q19. Ongoing training for my needs is available.             | <input type="radio"/> | <input type="radio"/> | <input type="radio"/> | <input type="radio"/> | <input type="radio"/> |

## Section 4: Documentation and Communication

Q20. What methods do you use to document?

- I type directly into EHR
- I use dictation/transcription services (back end dictation)
- I use Voice Recognition software (front end dictation)

(Please select all that apply.)

Q21. In your experience with Voice Recognition software, the tool...

- Has improved the quality of my clinical documentation
- Has decreased the time spent documenting client care
- Is acceptably accurate at transcribing my speech
- I would benefit from ongoing training
- I would benefit from increased accessibility/mobility of the tool
- None of the above

(Please select all that apply)

Q22. Do you feel communication regarding EHR changes are efficient?

- Always
- Almost always
- Some of the time
- Almost never

### **Section 5: Burnout**

Q23. Identify your symptoms of burnout.

- I enjoy my work.I have no symptoms of burnout.
- I am under stress, and don't always have as much energy as I did, but I don't feel burned out.
- I am definitely burning out and have one or more symptoms of burnout, e.g., emotional exhaustion.
- The symptoms of burnout that I am experiencing won't go away. I think about work frustrations a lot.
- I feel completely burned out. I am at the point where I may need to seek help.

Q24. Do you think EHR contributes to your symptoms of burnout?

- Always
- Almost always
- Some of the time
- Almost never

### **Section 6: General Feedback**

Q25. How would you rate your satisfaction with EHR?

- Very dissatisfied
- Somewhat dissatisfied
- Neither satisfied nor dissatisfied
- Somewhat satisfied
- Very satisfied

Q26. What do you believe you do differently from your peers while using the EHR?

---

Q27. Tell us about your experience with the EHR.

---

Q28. Do you have any other comments?

---
